# Supplementary material for: Effects of Mindful Eating and YogaDance among Overweight and Obese Women: An Exploratory Randomized Controlled Trial
Source: Nutrients. 2023 Mar 28;15(7):1646. doi: 10.3390/nu15071646 (PMC10096929; doi:10.3390/nu15071646)
Supplement: Supplementary file 1 [file nutrients-15-01646-s001.zip › suppl-tables-S2-S6.pdf]

**Table S2.** Baseline participant characteristics stratified according to intervention group for completers only (n=39).

|                               | <b>Mindful eating<br/>+YogaDance (n=14)</b> | <b>YogaDance<br/>(n=8)</b> | <b>Mindful eating<br/>(n=7)</b> | <b>Control<br/>(n=10)</b> |
|-------------------------------|---------------------------------------------|----------------------------|---------------------------------|---------------------------|
| Age, years                    | 39 (28-49)                                  | 41 (34-46)                 | 45 (27-56)                      | 41 (31-52)                |
| Height, m                     | 1.67 (1.64-1.72)                            | 1.68 (1.63-1.74)           | 1.74 (1.71-1.75)                | 1.68 (1.64-1.72)          |
| FM, kg                        | 31.7 (24.8-34.9)                            | 31.0 (24.6-33.6)           | 32.3 (31.9-40.3)                | 30.5 (27.3-37.1)          |
| FFM, kg                       | 41.9 (39.9-44.0)                            | 44.2 (41.0-47.5)           | 47.3 (44.3-50.6)                | 45.3 (42.6-48.4)          |
| BW, kg                        | 73.8 (68.7-82.6)                            | 77.2 (73.7-80.0)           | 87.9 (80.4-89.9)                | 78.5 (73.5-86.2)          |
| Fat percent, %                | 41 (38-43)                                  | 39 (36-44)                 | 43 (39-45)                      | 40 (36-45)                |
| BMI, kg/m <sup>2</sup>        | 27 (26-28)                                  | 27 (26-28)                 | 29 (28-30)                      | 27 (26-31)                |
| WC, cm                        | 87 (82-91)                                  | 85 (80-85)                 | 91 (87-94)                      | 90 (81-99)                |
| VF, g                         | 761 (533-1283)                              | 634 (483-703)              | 1032 (658-1211)                 | 1034 (383-1204)           |
| BMD, g/cm <sup>2</sup>        | 1.2 (1.2-1.3)                               | 1.2 (1.2-1.3)              | 1.3 (1.2-1.3)                   | 1.3 (1.2-1.3)             |
| SBP, mmHg                     | 106 (97-113)                                | 113 (104-118)              | 106 (102-109)                   | 109 (104-124)             |
| DBP, mmHg                     | 72 (65-78)                                  | 73 (68-79)                 | 72 (69-74)                      | 74 (69-80)                |
| WHO-QOL<br>physical dimension | 14 (14-15)                                  | 12 (11-14)                 | 13 (13-17)                      | 15 (14-16)                |
| WHO-QOL<br>mental dimension   | 13 (12-15)                                  | 12 (12-14)                 | 15 (14-16)                      | 14 (14-15)                |
| IES-2 total                   | 2.9 (2.84-3.5)                              | 2.8 (2.5-3.2)              | 3.0 (2.6-3.6)                   | 3.4 (3.2-3.7)             |
| EI, kcal/day                  | 1994 (1400-2388)                            | 816 (559-1088)             | 2503 (1694-3657)                | 1490 (1179-2657)          |
| MET, min/week                 | 1436 (1037-2062)                            | 692 (428-855)              | 1788 (1190-2665)                | 1262 (883-2131)           |

Data shown as medians and interquartile ranges.

BMD=bone mass density, BMI=body mass index, BW=body weight, DBP=diastolic blood pressure, EI=energy intake, FFM=fat-free mass, FM=fat mass, IES-2=Overall Intuitive Eating Scale-2 score (values in the interval 1-5), MET=metabolic equivalents of task, SBP=systolic blood pressure, VF=visceral fat, WC=waist circumference, WHO-QOL=World Health Organization quality of life score (values in the interval 4-20).

**Table S3.** Pairwise comparisons of means at end of study (after 8 weeks) based on intention-to-treat analyses adjusted for physical activity (n=61).

| Outcome                    | Mindful eating vs. control |         | YogaDance vs. control |         | Mindful eating+YogaDance vs. control |         |
|----------------------------|----------------------------|---------|-----------------------|---------|--------------------------------------|---------|
|                            | (n=15 vs n=15)             |         | (n=15 vs n=15)        |         | (n=16 vs n=15)                       |         |
|                            | Estimate                   | p-value | Estimate              | p-value | Estimate                             | p-value |
| FM, kg                     | -1.6 (-10.2, 7.0)          | 0.73    | -2.5 (-10.6, 5.6)     | 0.56    | -1.8 (-10.0, 6.6)                    | 0.68    |
| FFM, kg                    | 1.3 (-3.6, 6.1)            | 0.61    | 2.7 (-2.6, 8.1)       | 0.32    | 0.4 (-5.1, 6.0)                      | 0.88    |
| BW, kg                     | -0.9 (-16.8, 15.0)         | 0.91    | -3.0 (-17.1, 11.1)    | 0.69    | -2.5 (-17.2, 12.2)                   | 0.75    |
| Fat percent, %             | 0.3 (-3.2, 3.9)            | 0.86    | -2.0 (-6.8, 2.9)      | 0.46    | -0.5 (-3.9, 3.0)                     | 0.80    |
| BMI, kg/m <sup>2</sup>     | -0.7 (-3.0, 1.7)           | 0.58    | 0.00 (-2.6, 2.6)      | >0.99   | -0.2 (-3.0, 2.6)                     | 0.89    |
| WC, cm                     | -0.3 (-9.2, 8.6)           | 0.95    | -2.5 (-13.8, 8.8)     | 0.67    | -3.0 (-12.0, 6.0)                    | 0.53    |
| VF, g                      | -110 (-494, 275)           | 0.59    | 89 (-490, 312)        | 0.69    | 2 (-360, 364)                        | 0.99    |
| BMD, g/cm <sup>2</sup>     | -0.03 (-0.15, 0.09)        | 0.65    | -0.02 (-0.12, 0.09)   | 0.77    | 0.00 (-0.09, 0.09)                   | >0.99   |
| SBP, mmHg                  | -8.0 (-20.1, 4.2)          | 0.21    | -7.5 (-19.5, 4.6)     | 0.26    | -1.4 (-13.9, 11.1)                   | 0.83    |
| DBP, mmHg                  | -1.2 (-10.0, 7.7)          | 0.80    | -0.9 (-9.6, 7.7)      | 0.84    | 0.8 (-7.8, 9.3)                      | 0.86    |
| WHO-QOL physical dimension | 0.4 (-2.9, 3.7)            | 0.81    | 1.4 (-1.5, 4.3)       | 0.36    | 0.9 (-1.6, 3.5)                      | 0.48    |
| WHO-QOL mental dimension   | 1.5 (-2.4, 5.3)            | 0.50    | 1.4 (-2.1, 4.9)       | 0.45    | 1.1 (-1.9, 4.2)                      | 0.49    |
| IES-2 total                | 0.3 (-0.3, 0.9)            | 0.39    | -0.02 (-0.6, 0.6)     | 0.95    | 0.3 (-0.1, 0.8)                      | 0.17    |
| EI, kcal/day               | 21 (-4048, 4090)           | 0.99    | 595 (-3320, 4511)     | 0.76    | 1425 (-2797, 5646)                   | 0.50    |

Data shown as mean differences with corresponding 95% confidence intervals and p-values based on analysis of covariance including the baseline outcome value and baseline physical activity as covariates.

BMD=bone mass density, BMI=body mass index, BW=body weight, DBP=diastolic blood pressure, EI=energy intake, FFM=fat-free mass, FM=fat mass, IES-2=Overall Intuitive Eating Scale-2 score (values in the interval 1-5), SBP=systolic blood pressure, VF=visceral fat, WC=waist circumference, WHO-QOL=WHO quality of life score (values in the interval 4-20).

**Table S4.** Pairwise comparisons of means at end of study (after 8 weeks) based on intention-to-treat analyses adjusted for both energy intake and physical activity (n=61).

| Outcome                    | Mindful eating vs. control |         | YogaDance vs. control |         | Mindful eating+YogaDance vs. control |         |
|----------------------------|----------------------------|---------|-----------------------|---------|--------------------------------------|---------|
|                            | (n=15 vs n=15)             |         | (n=15 vs n=15)        |         | (n=16 vs n=15)                       |         |
|                            | Estimate                   | p-value | Estimate              | p-value | Estimate                             | p-value |
| FM, kg                     | -1.6 (-10.2, 7.0)          | 0.72    | -2.8 (-10.9, 5.3)     | 0.52    | -1.6 (-9.9, 6.8)                     | 0.72    |
| FFM, kg                    | 1.2 (-3.7, 6.1)            | 0.64    | 2.6 (-2.7, 8.0)       | 0.33    | 0.5 (-5.1, 6.0)                      | 0.88    |
| BW, kg                     | -1.2 (-17.1, 14.7)         | 0.89    | -3.6 (-17.7, 10.5)    | 0.64    | -2.5 (-17.2, 12.3)                   | 0.75    |
| Fat percent, %             | 0.3 (-3.3, 3.9)            | 0.88    | -2.0 (-6.8, 2.9)      | 0.46    | -0.4 (-3.8, 3.0)                     | 0.83    |
| BMI, kg/m <sup>2</sup>     | -0.7 (-3.0, 1.7)           | 0.59    | 0.01 (-2.6, 2.6)      | >0.99   | -0.2 (-3.0, 2.6)                     | 0.89    |
| WC, cm                     | -0.5 (-9.5, 8.4)           | 0.91    | -2.7 (-14.0, 8.6)     | 0.66    | -2.9 (-11.9, 6.2)                    | 0.55    |
| VF, g                      | -122 (-507, 263)           | 0.55    | 98 (-498, 303)        | 0.66    | 15 (-347, 378)                       | 0.94    |
| BMD, g/cm <sup>2</sup>     | -0.03 (-0.15, 0.09)        | 0.65    | -0.02 (-0.12, 0.09)   | 0.77    | 0.00 (-0.09, 0.09)                   | 0.98    |
| SBP, mmHg                  | -7.9 (-20.1, 4.3)          | 0.24    | -7.4 (-19.5, 4.6)     | 0.27    | -1.5 (-13.9, 11.0)                   | 0.82    |
| DBP, mmHg                  | -1.2 (-10.0, 7.7)          | 0.79    | -0.9 (-9.6, 7.7)      | 0.84    | 0.8 (-7.7, 9.3)                      | 0.85    |
| WHO-QOL physical dimension | 0.4 (-2.9, 3.7)            | 0.81    | 1.4 (-1.5, 4.3)       | 0.36    | 1.0 (-1.6, 3.5)                      | 0.48    |
| WHO-QOL mental dimension   | 1.3 (-2.5, 5.1)            | 0.54    | 1.4 (-2.1, 4.9)       | 0.48    | 1.3 (-1.8, 4.4)                      | 0.44    |
| IES-2 total                | 0.3 (-0.3, 0.9)            | 0.42    | -0.0 (-0.6, 0.6)      | 0.98    | 0.4 (-0.1, 0.8)                      | 0.13    |

Data shown as mean differences with corresponding 95% confidence intervals and p-values based on analysis of covariance including the baseline outcome value, baseline energy intake, and baseline physical activity as covariates.

BMD=bone mass density, BMI=body mass index, BW=body weight, DBP=diastolic blood pressure, EI=energy intake, FFM=fat-free mass, FM=fat mass, IES-2=Overall Intuitive Eating Scale-2 score (values in the interval 1-5), SBP=systolic blood pressure, VF=visceral fat, WC=waist circumference, WHO-QOL=WHO quality of life score (values in the interval 4-20).

**Table S5.** Pairwise comparisons of means at end of study (after 8 weeks) based on complete-case analyses adjusted for physical activity (n=39).

| Outcome                   | Mindful eating vs. control |             | YogaDance vs. control |         | Mindful eating+YogaDance vs. control |              |
|---------------------------|----------------------------|-------------|-----------------------|---------|--------------------------------------|--------------|
|                           | (n=7 vs n=10)              |             | (n=8 vs n=10)         |         | (n=14 vs n=10)                       |              |
|                           | Estimate                   | p-value     | Estimate              | p-value | Estimate                             | p-value      |
| FM, kg                    | -0.9 (-2.5, 0.8)           | 0.29        | -0.1 (-1.6, 1.5)      | 0.95    | -0.9 (-2.3, 0.5)                     | 0.19         |
| FFM, kg                   | 0.8 (-0.5, 2.0)            | 0.22        | -0.1 (-1.3, 1.2)      | 0.92    | 0.6 (-0.5, 1.6)                      | 0.29         |
| BW, kg                    | -0.8 (-3.0, 1.4)           | 0.46        | 0.0 (-2.1, 2.2)       | 0.82    | -0.2 (-2.0, 1.7)                     | 0.90         |
| Fat percent, %            | -0.5 (-1.7, 0.7)           | 0.37        | -0.1 (-1.3, 1.0)      | 0.78    | -1.1 (-2.1, -0.1)                    | <b>0.03</b>  |
| BMI, kg/m <sup>2</sup>    | -0.2 (-1.0, 0.5)           | 0.56        | 0.1 (-0.6, 0.9)       | 0.67    | 0.00 (-0.6, 0.6)                     | 0.99         |
| WC, cm                    | -3.7 (-8.0, 0.5)           | 0.08        | -0.9 (-5.2, 3.4)      | 0.35    | -3.4 (-6.9, 0.2)                     | 0.06         |
| VF, g                     | -78 (-211, 56)             | 0.25        | 63 (-71, 196)         | 0.95    | -36 (-146, 73)                       | 0.50         |
| BMD, g/cm <sup>2</sup>    | -0.01 (-0.03, 0.02)        | 0.68        | 0.00 (-0.03, 0.03)    | 0.39    | 0.00 (-0.02, 0.03)                   | 0.89         |
| SBP, mmHg                 | -3.2 (-13.0, 6.6)          | 0.51        | -4.0 (-13.2, 5.2)     | 0.63    | -0.6 (-8.8, 7.6)                     | 0.88         |
| DBP, mmHg                 | -0.7 (-6.7, 5.3)           | 0.81        | 1.4 (-4.4, 7.1)       | 0.18    | 2.0 (-3.0, 7.0)                      | 0.41         |
| WHOQOL physical dimension | 0.9 (-4.7, 6.6)            | 0.27        | 1.0 (-0.7, 2.7)       | 0.24    | 1.0 (-0.4, 2.5)                      | 0.14         |
| WHOQOL mental dimension   | 1.1 (-0.4, 2.7)            | 0.15        | 0.4 (-1.2, 1.9)       | 0.61    | 1.3 (0.02, 2.6)                      | <b>0.047</b> |
| IES-2 total               | 0.5 (0.1, 0.9)             | <b>0.01</b> | -0.01 (-0.4, 0.4)     | 0.97    | 0.4 (0.1, 0.8)                       | <b>0.01</b>  |
| EI, kcal/day              | -1568 (-4234, 1097)        | 0.24        | 39 (-2481, 2560)      | 0.97    | 1688 (-480, 3857)                    | 0.12         |

Data shown as mean differences with corresponding 95% confidence intervals and p-values based on analysis of covariance including the baseline outcome value and baseline physical activity as covariates.

BMD=bone mass density, BMI=body mass index, BW=body weight, DBP=diastolic blood pressure, EI=energy intake, FFM=fat-free mass, FM=fat mass, IES-2=Overall Intuitive Eating Scale-2 score (values in the interval 1-5), SBP=systolic blood pressure, VF=visceral fat, WC=waist circumference, WHO-QOL=WHO quality of life score (values in the interval 4-20).

**Table S6.** Pairwise comparisons of means at end of study (after 8 weeks) based on complete-case analyses adjusted for both energy intake and physical activity (n=39).

| Outcome                   | Mindful eating vs. control |             | YogaDance vs. control |         | Mindful eating+YogaDance vs. control |              |
|---------------------------|----------------------------|-------------|-----------------------|---------|--------------------------------------|--------------|
|                           | (n=7 vs n=10)              |             | (n=8 vs n=10)         |         | (n=14 vs n=10)                       |              |
|                           | Estimate                   | p-value     | Estimate              | p-value | Estimate                             | p-value      |
| FM, kg                    | -1.1 (-2.8, 0.5)           | 0.17        | -0.3 (-1.9, 1.3)      | 0.69    | -0.8 (-2.1, 0.5)                     | 0.24         |
| FFM, kg                   | 0.8 (-0.5, 2.1)            | 0.21        | -0.0 (-1.3, 1.3)      | 0.97    | 0.6 (-0.5, 1.6)                      | 0.30         |
| BW, kg                    | -1.0 (-3.2, 1.4)           | 0.40        | -0.2 (-2.4, 2.1)      | 0.89    | -0.1 (-2.0, 1.8)                     | 0.92         |
| Fat percent, %            | -0.8 (-1.9, 0.4)           | 0.18        | -0.3 (-1.3, 0.8)      | 0.63    | -0.96 (-1.89, -0.02)                 | <b>0.045</b> |
| BMI, kg/m <sup>2</sup>    | -0.3 (-1.1, 0.5)           | 0.47        | 0.0 (-0.7, 0.8)       | 0.90    | 0.00 (-0.6, 0.7)                     | 0.96         |
| WC, cm                    | -4.6 (-8.9, -0.3)          | <b>0.04</b> | -1.7 (-6.0, 2.6)      | 0.43    | -3.0 (-6.5, 0.4)                     | 0.08         |
| VF, g                     | -98 (-231, 35)             | 0.14        | 45 (-88, 177)         | 0.50    | -23 (-131, 86)                       | 0.67         |
| BMD, g/cm <sup>2</sup>    | -0.01 (-0.04, 0.03)        | 0.76        | 0.00 (-0.03, 0.03)    | 0.92    | 0.00 (-0.03, 0.03)                   | 0.92         |
| SBP, mmHg                 | -3.8 (-14.1, 6.5)          | 0.45        | -4.2 (-13.7, 5.2)     | 0.37    | -0.5 (-8.8, 7.8)                     | 0.90         |
| DBP, mmHg                 | -0.5 (-6.8, 5.8)           | 0.88        | 1.5 (-4.4, 7.3)       | 0.62    | 1.9 (-3.2, 7.0)                      | 0.45         |
| WHOQOL physical dimension | 1.0 (-0.8, 2.8)            | 0.27        | 1.0 (-0.7, 2.8)       | 0.25    | 1.0 (-0.4, 2.5)                      | 0.16         |
| WHOQOL mental dimension   | 1.0 (-0.6, 2.5)            | 0.23        | 0.3 (-1.3, 1.9)       | 0.70    | 1.4 (0.1, 2.7)                       | <b>0.04</b>  |
| IES-2 total               | 0.5 (0.1, 0.9)             | <b>0.02</b> | -0.00 (-0.4, 0.4)     | >0.99   | 0.5 (0.2, 0.8)                       | <b>0.01</b>  |

Data shown as mean differences with corresponding 95% confidence intervals and p-values based on analysis of covariance including the baseline outcome value, baseline energy intake, and baseline physical activity as covariates.

BMD=bone mass density, BMI=body mass index, BW=body weight, DBP=diastolic blood pressure, FFM=fat-free mass, FM=fat mass, IES-2=Overall Intuitive Eating Scale-2 score (values in the interval 1-5), SBP=systolic blood pressure, VF=visceral fat, WC=waist circumference, WHO-QOL=WHO quality of life score (values in the interval 4-20).
